# Supplementary material
Source: publisher figshare collection journal article supplement (https://frontiersin.figshare.com/ndownloader/files/39650185)
Supplement: Supplementary file 1 [file 39650185]

Supplementary Material

A Content Validity and Cognitive Interview to Develop the HARMONI Items: Instrument Measuring Student Well-being in West Java Indonesia

**Hery Susanto1, Miryam Wedyaswari1, Karolina Lamtiur Dalimunthe1***

1Center of Psychological Innovation and Research, Faculty of Psychology,
Universitas Padjadjaran, Sumedang, Indonesia

*** Correspondence:**Karolina Lamtiur Dalimunthe
[karolina@unpad.ac.id](mailto:karolina@unpad.ac.id)

Table S1
Items with I-CVI values of less than 1

|  | Item | |
| --- | --- | --- |
| Number | English translation | Original wording (Bahasa Indonesia) |
| P2 | I feel comfortable doing learning activities during school. | *Saya merasa nyaman menjalani kegiatan belajar.* |
| P3 | I feel comfortable interacting with school people. | *Saya merasa nyaman berinteraksi dengan orang-orang sekolah.* |
| R13 | The teacher showed care for me while I was at school. | *Guru mencurahkan perhatiannya pada saat saya bersekolah.* |
| R16 | The school staff and I know each other. | *Saya dan pegawai sekolah saling mengenal.* |
| O1 | In general, I am proud of my progress in school. | *Secara umum, saya bangga dengan peningkatan saya selama bersekolah.* |
| O2 | So far, I have achieved a lot during school. | *Sejauh ini saya telah mencapai banyak hal selama bersekolah.* |
| S16 | I know the right way to apply my strengths. | *Saya mengetahui cara yang tepat untuk menerapkan kekuatan diri saya.* |
| E18 | I took the initiative to conduct a discussion of the subject matter. | *Saya berinisiatif untuk melakukan diskusi materi pelajaran.* |
| RE8 | I know when to keep my distance to clear my mind. | *Saya tahu kapan harus menjaga jarak untuk menjernihkan pemikiran saya.* |
| RE16 | I have thoughts that help me to rise from setbacks. | *Saya memiliki pemikiran-pemikiran yang membantu saya untuk bangkit dari kemunduran.* |
